# Supplementary material for: Research Progress in Prognostic Factors and Biomarkers of Ovarian Cancer
Source: PubMed Central journal article supplement (PMC8176232; doi:10.7150/jca.47695), 2021-05-13
Supplement: jcav12p3976s1.pdf [file jcav12p3976s1.pdf]

## Supplementary appendix

### 1. Search strategy

((ovarian neoplasms [Title/Abstract]) OR (ovarian cancer [Title/Abstract])) OR (ovarian malignant tumor [Title/Abstract]) AND (((prognosis [Title/Abstract]) OR (prognoses [Title/Abstract])) OR (prognostic [Title/Abstract])) OR (prognostic factors [Title/Abstract])) OR (prognostic factor [Title/Abstract]) Sort by: Best Match  
Filters: Free full text; published between February 1, 2015 and February 1, 2021;  
Humans

### 2. Selection criteria

|                                               |                                                                                                         |
|-----------------------------------------------|---------------------------------------------------------------------------------------------------------|
| <b>Inclusion criteria</b>                     | Ovarian cancer patients who have received surgery and/or radio(chemo)therapy as part of their treatment |
|                                               | The prognostic value of novel prognostic markers was reported in the studies                            |
|                                               | All the studies were published between February 1, 2015 and February 1, 2021                            |
| <b>Exclusion criteria</b>                     | The number of patients was less than 50 in these studies                                                |
|                                               | Prognostic factors of other diseases unrelated to ovarian cancer                                        |
|                                               | Prognostic factors were studied only in cell lines and/or animal models                                 |
|                                               | Systematic reviews and critical articles                                                                |
|                                               | Studies had no positive results                                                                         |
| Studies not associated with clinical outcomes |                                                                                                         |
